# Supplementary material for: Chemical Investigation of the Indonesian Tunicate Polycarpa aurata and Evaluation of the Effects Against Schistosoma mansoni of the Novel Alkaloids Polyaurines A and B
Source: PubMed Central journal article supplement (PMC6562961; doi:10.3390/md17050278), 2019-05-10
Supplement: marinedrugs-17-00278-s001.pdf [file marinedrugs-17-00278-s001.pdf]

# Chemical Investigation of the Indonesian Tunicate *Polycarpa aurata* and Evaluation of the Effects Against *Schistosoma mansoni* of the Novel Alkaloids Polyaurines A and B.

Marcello Casertano<sup>1</sup>, Concetta Imperatore<sup>1</sup>, Paolo Luciano<sup>1</sup>, Anna Aiello<sup>1</sup>, Masteria Yunovilsa Putra<sup>2</sup>, Roberto Gimmelli<sup>3</sup>, Giovina Ruberti<sup>3</sup> and Marialuisa Menna<sup>1,\*</sup>

- <sup>1</sup> The NeaNat Group, Department of Pharmacy, University of Naples "Federico II", Via D. Montesano 49, 80131 Napoli, Italy; [marcello.casertano@unina.it](mailto:marcello.casertano@unina.it) (M.C.); [cimperat@unina.it](mailto:cimperat@unina.it) (C.I.); [pluciano@unina.it](mailto:pluciano@unina.it) (P.L.); [aiello@unina.it](mailto:aiello@unina.it) (A.A.)
  - <sup>2</sup> Research Center for Oceanography, Indonesian Institute of Sciences. Jl Pasir Putih Raya 1, DKI Jakarta 14430, Indonesia; [mast001@lipi.go.id](mailto:mast001@lipi.go.id) (M.Y.P.)
  - <sup>3</sup> Institute of Cell biology and Neurobiology, National Research Council, Campus A. Buzzati-Traverso, Via E. Ramarini, 32, 00015 Monterotondo (Roma), Italy; [roberto.gimmelli@ibcn.cnr.it](mailto:roberto.gimmelli@ibcn.cnr.it) (R.G.); [giovina.ruberti@cnr.it](mailto:giovina.ruberti@cnr.it) (G.R.)
- \* Correspondence: [mlmenna@unina.it](mailto:mlmenna@unina.it) (M.M.); Tel.: +39-081-678518

## TABLE OF CONTENTS

|                                                                                                 |    |
|-------------------------------------------------------------------------------------------------|----|
| Figure S1. HRESIMS spectrum of polyaurine A (1).....                                            | 3  |
| Figure S2. <sup>1</sup> H NMR spectrum of polyaurine A (1) in CDCl <sub>3</sub> (500 MHz).....  | 3  |
| Figure S3. <sup>13</sup> C NMR spectrum of polyaurine A (1) in CDCl <sub>3</sub> (500 MHz)..... | 4  |
| Figure S4. HSQC spectrum of polyaurine A (1) in CDCl <sub>3</sub> (500 MHz).....                | 4  |
| Figure S5. COSY spectrum of polyaurine A (1) in CDCl <sub>3</sub> (500 MHz).....                | 5  |
| Figure S6. HMBC spectrum of polyaurine A (1) in CDCl <sub>3</sub> (500 MHz).....                | 5  |
| Figure S7. HRESI-MS spectrum of polyaurine B (2).....                                           | 6  |
| Figure S8. <sup>1</sup> H NMR spectrum of polyaurine B (2) in CDCl <sub>3</sub> (700 MHz).....  | 6  |
| Figure S9. <sup>13</sup> C NMR spectrum of polyaurine B (2) in CDCl <sub>3</sub> (700 MHz)..... | 7  |
| Figure S10. HSQC spectrum of polyaurine B (2) in CDCl <sub>3</sub> (700 MHz).....               | 7  |
| Figure S11. COSY spectrum of polyaurine B (2) in CDCl <sub>3</sub> (700 MHz).....               | 8  |
| Figure S12. HMBC spectrum of polyaurine B (2) in CDCl <sub>3</sub> (700 MHz).....               | 8  |
| Figure S13. HRESI-MS spectrum of compound 3.....                                                | 9  |
| Figure S14. <sup>1</sup> H NMR spectrum of compound 3 in CDCl <sub>3</sub> (700 MHz).....       | 9  |
| Figure S15. COSY spectrum of compound 3 in CDCl <sub>3</sub> (700 MHz).....                     | 10 |
| Figure S16. HRESI-MS spectrum of compound 4 .....                                               | 10 |
| Figure S17. <sup>1</sup> H NMR spectrum of compound 4 in CDCl <sub>3</sub> (700 MHz).....       | 11 |
| Figure S18. HSQC spectrum of compound 4 in CDCl <sub>3</sub> (700 MHz).....                     | 11 |
| Figure S19. COSY spectrum of compound 4 in CDCl <sub>3</sub> (700 MHz).....                     | 12 |
| Figure S20. HMBC spectrum of compound 4 in CDCl <sub>3</sub> (700 MHz).....                     | 12 |
| Figure S21. HRESI-MS spectrum of compound 5 .....                                               | 13 |
| Figure S22. <sup>1</sup> H NMR spectrum of compound 5 in CDCl <sub>3</sub> (700 MHz).....       | 13 |
| Figure S23. HRESI-MS spectrum of compound 6 .....                                               | 14 |
| Figure S24. <sup>1</sup> H NMR spectrum of compound 6 in CDCl <sub>3</sub> (500 MHz).....       | 14 |
| Figure S25. HRESI-MS spectrum of compound 7 .....                                               | 15 |
| Figure S26. <sup>1</sup> H NMR spectrum of compound 7 in CDCl <sub>3</sub> (500 MHz).....       | 15 |
| Figure S27. HRESI-MS spectrum of compound 8 .....                                               | 16 |
| Figure S28. <sup>1</sup> H NMR spectrum of compound 8 in CDCl <sub>3</sub> (700 MHz).....       | 16 |

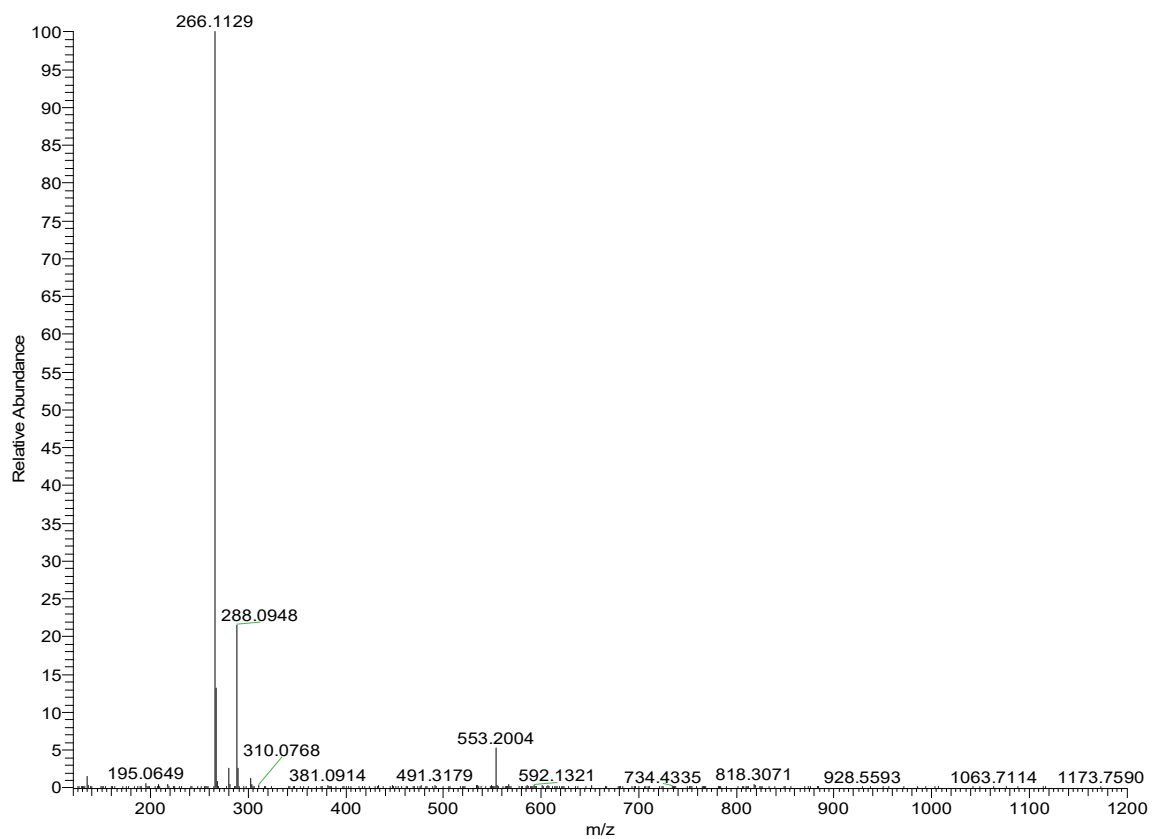

Figure S1. HRESI-MS spectrum of polyaurine A (1)

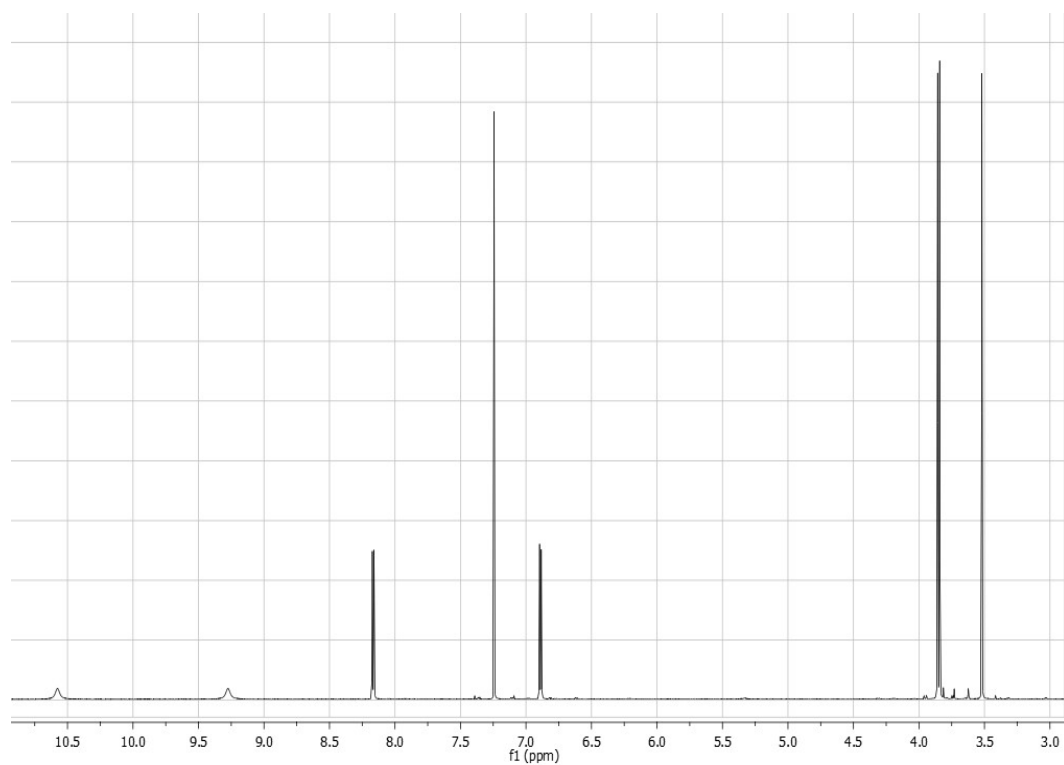

Figure S2. <sup>1</sup>H NMR spectrum of polyaurine A (1) in CDCl<sub>3</sub> (500 MHz)

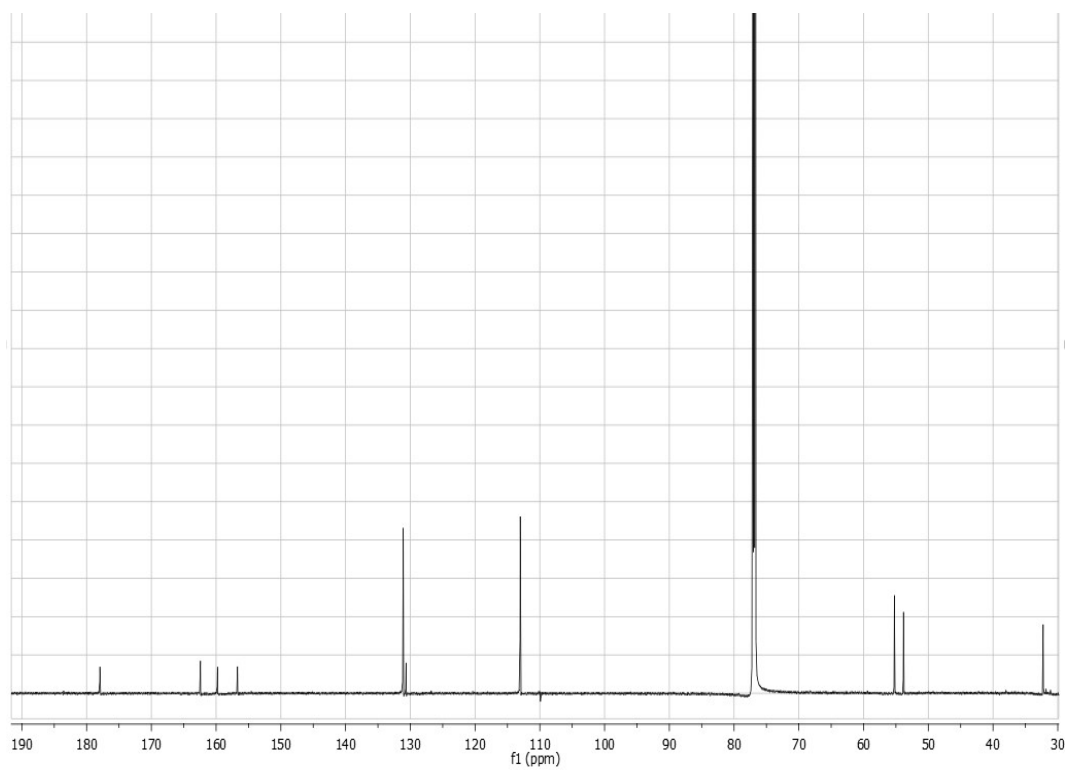

**Figure S3.**  $^{13}\text{C}$  NMR spectrum of polyaurine A (1) in  $\text{CDCl}_3$  (500 MHz)

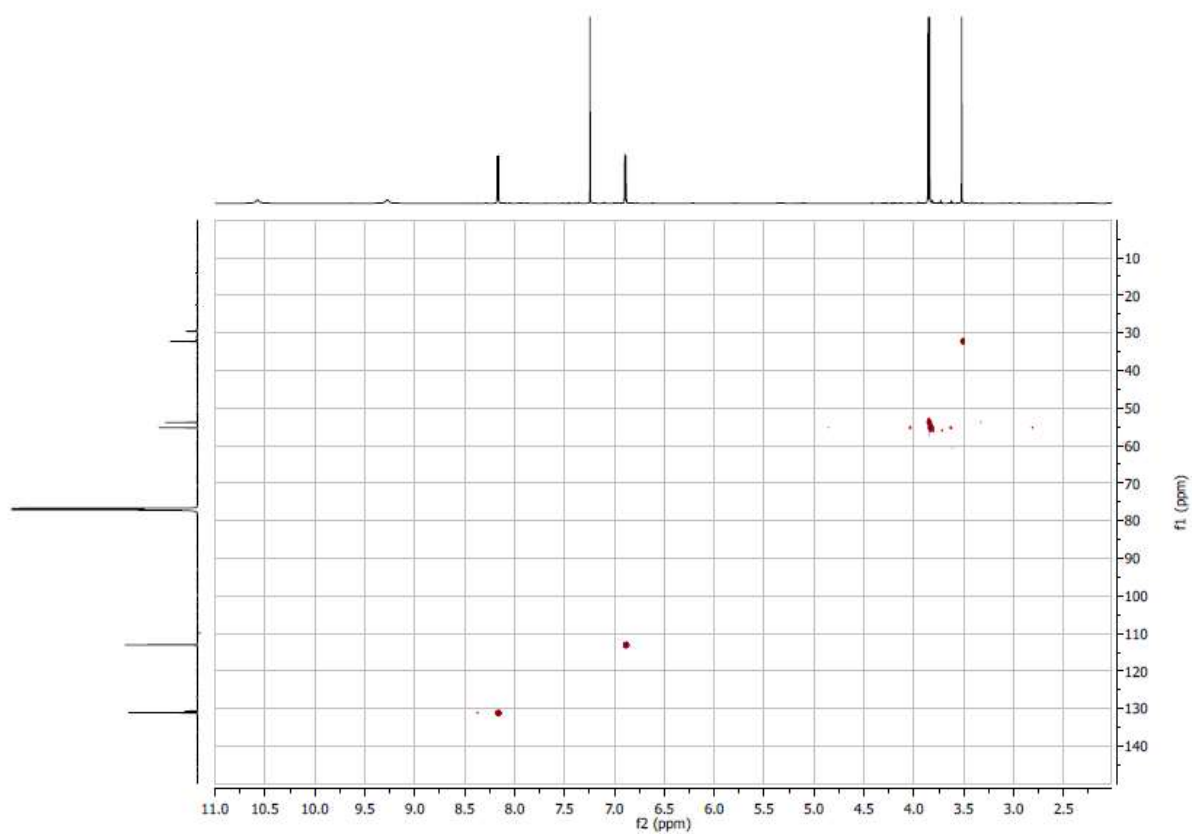

**Figure S4.** HSQC spectrum of polyaurine A (1) in  $\text{CDCl}_3$  (500 MHz)

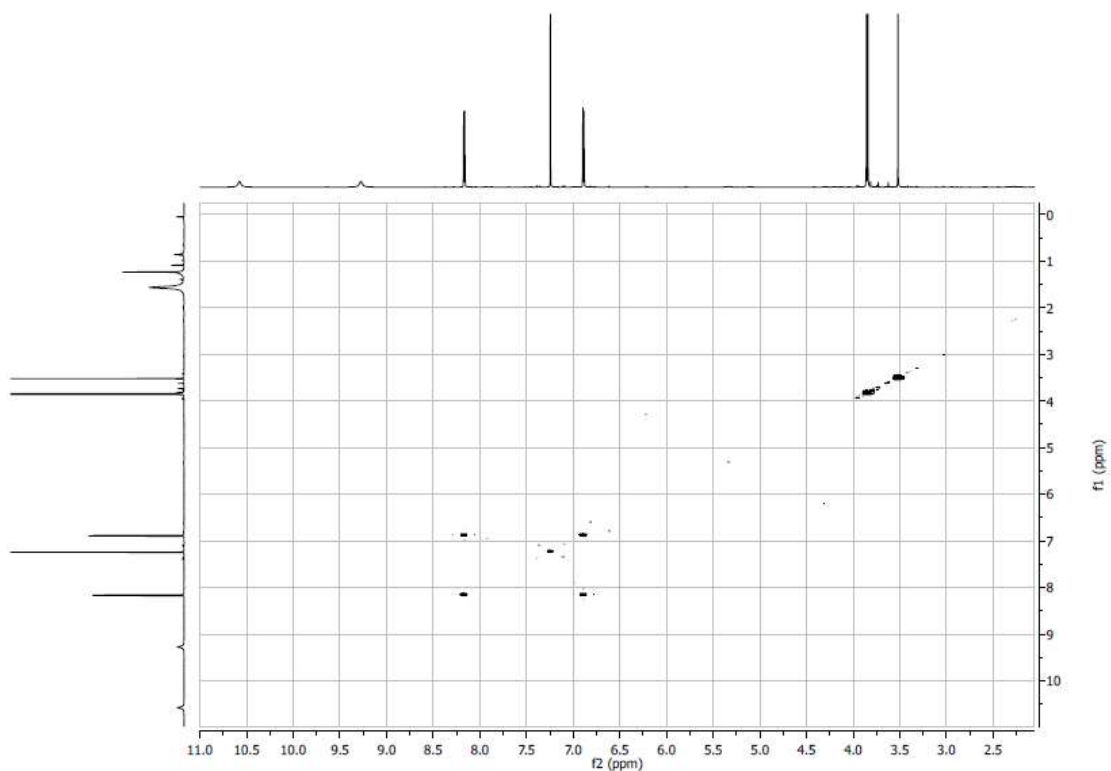

**Figure S5.** COSY spectrum of polyaurine A (**1**) in CDCl<sub>3</sub> (500 MHz)

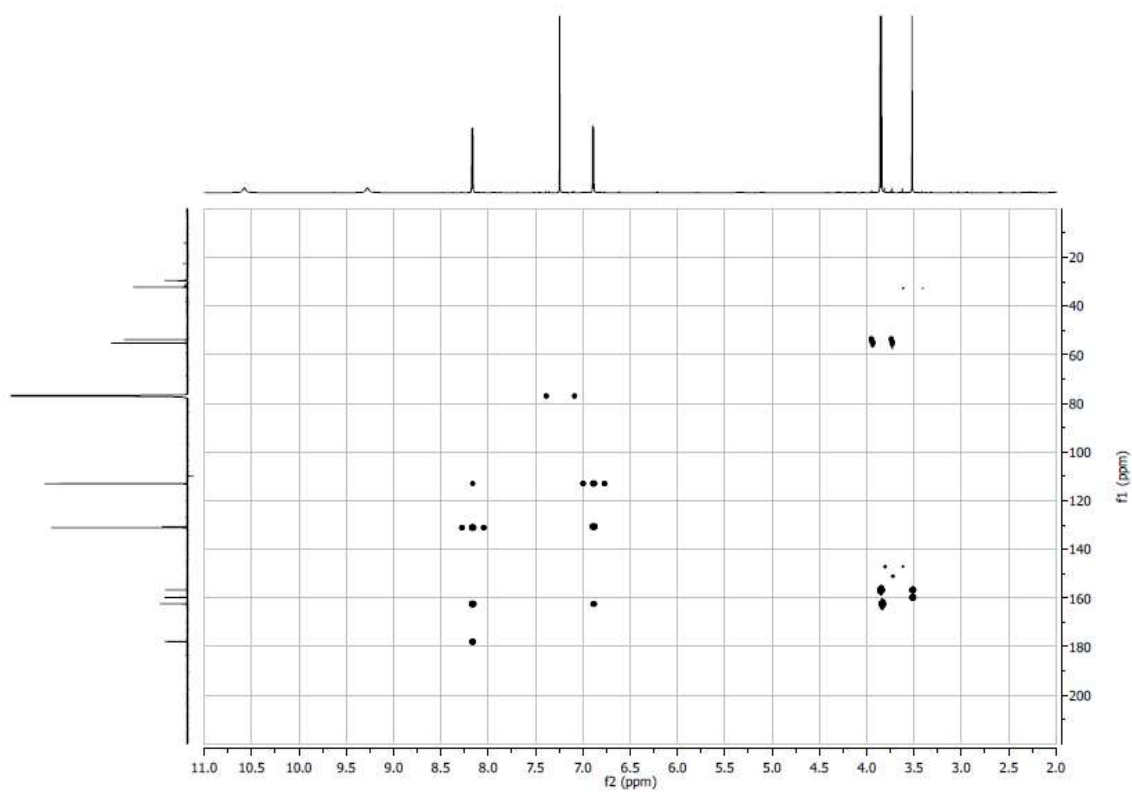

**Figure S6.** HMBC spectrum of polyaurine A (**1**) in CDCl<sub>3</sub> (500 MHz)

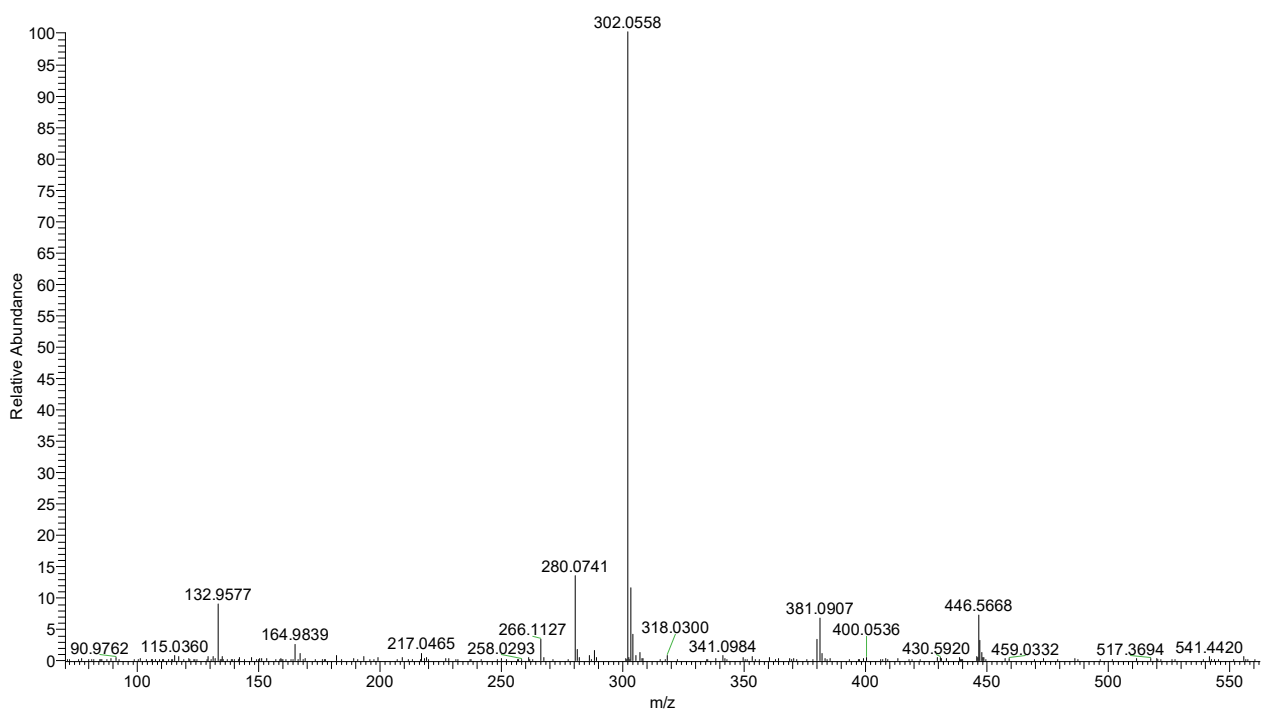

**Figure S7.** HRESI-MS spectrum of polyaurine B (2)

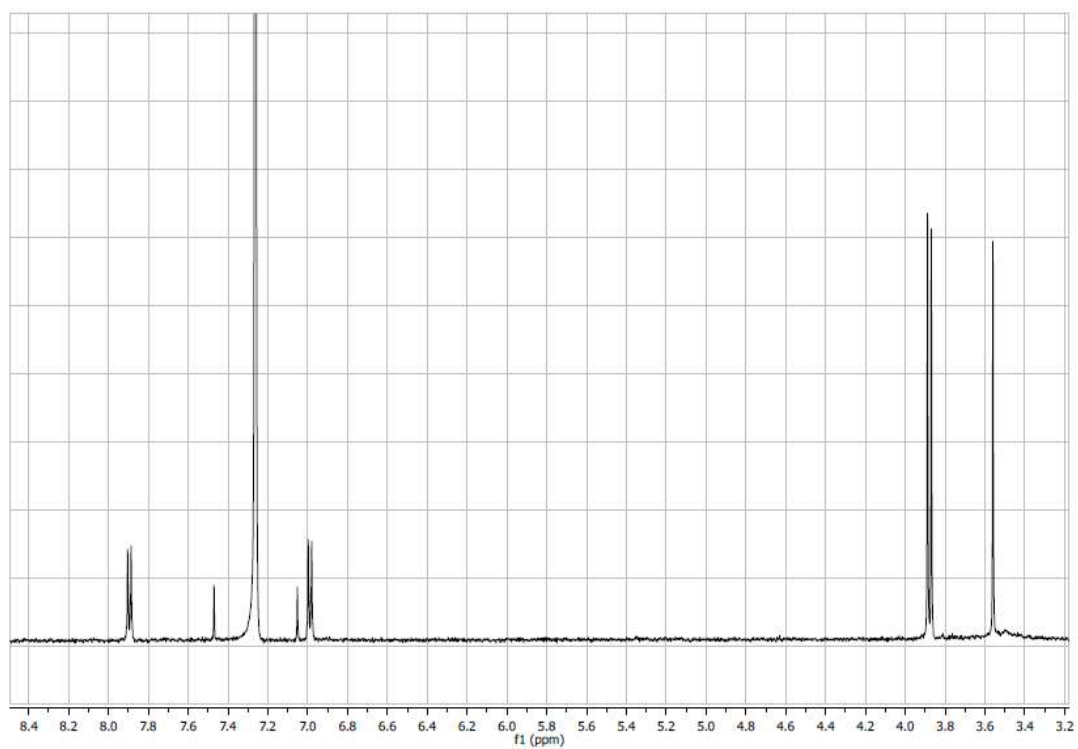

**Figure S8.** <sup>1</sup>H NMR spectrum of polyaurine B (2) in CDCl<sub>3</sub> (700 MHz)

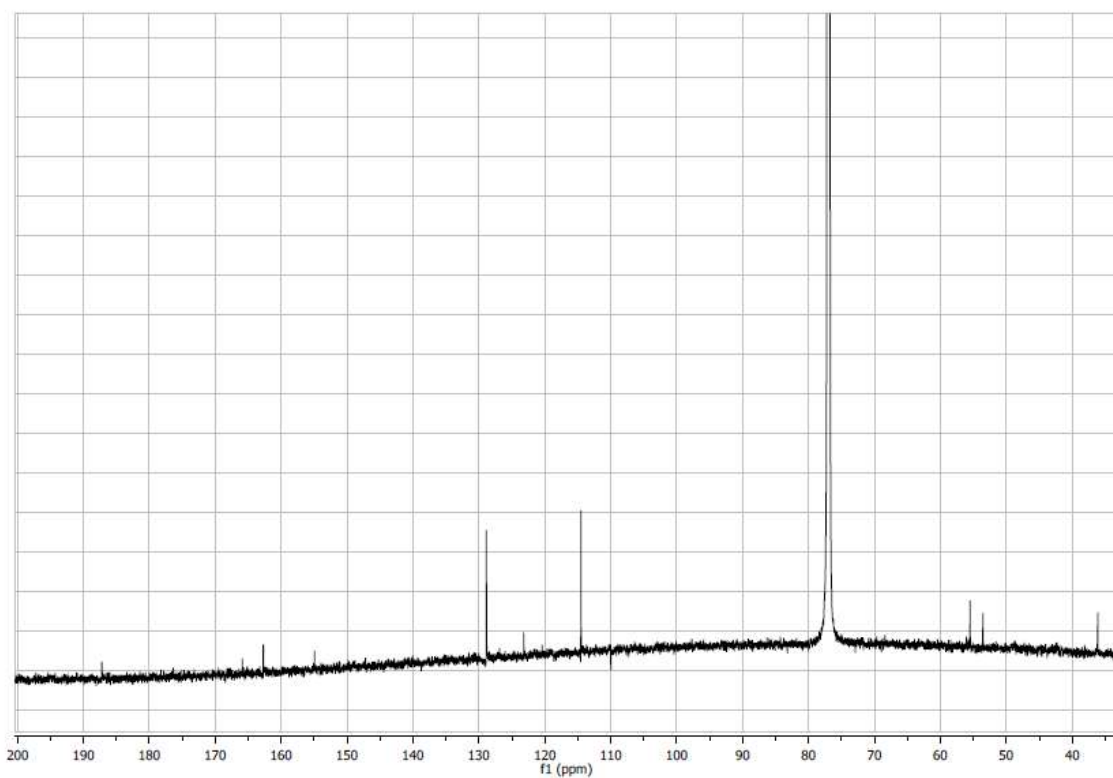

Figure S9.  $^{13}\text{C}$  NMR spectrum of polyaurine B (**2**) in  $\text{CDCl}_3$  (700 MHz)

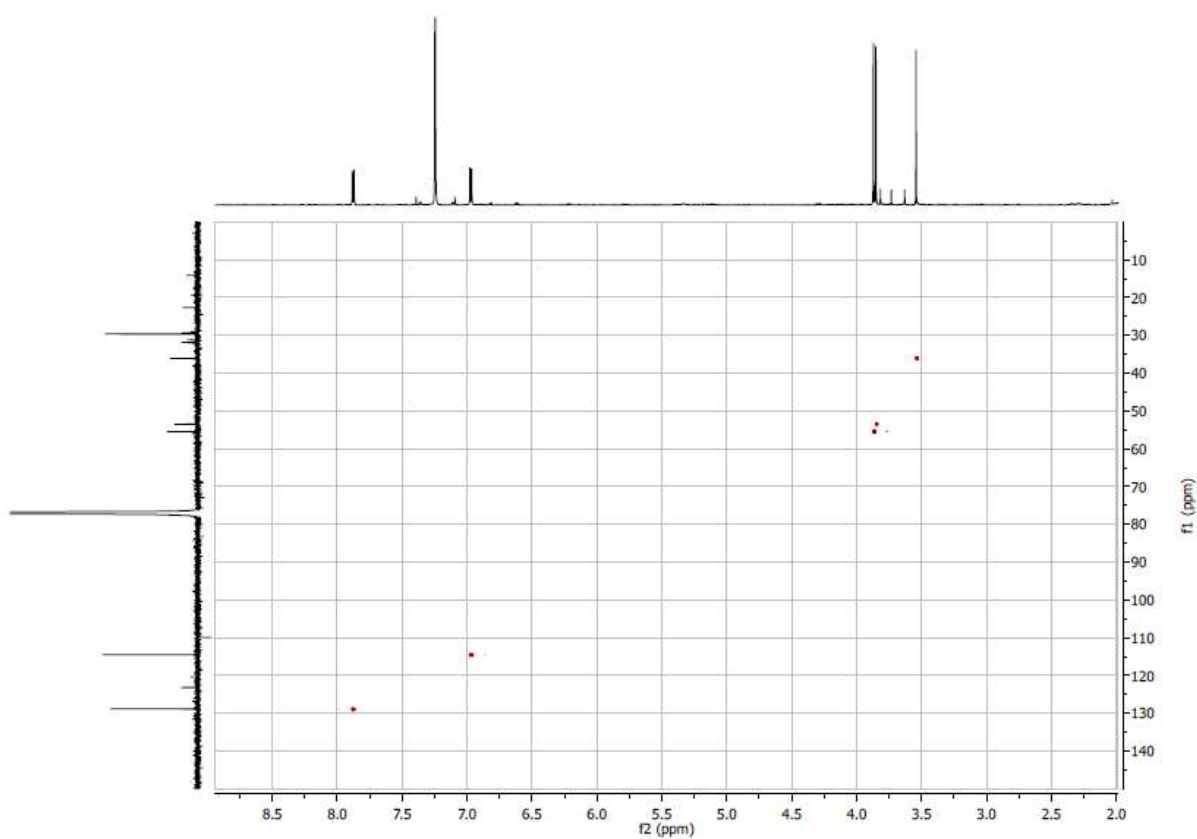

Figure S10. HSQC spectrum of polyaurine B (**2**) in  $\text{CDCl}_3$  (700 MHz)

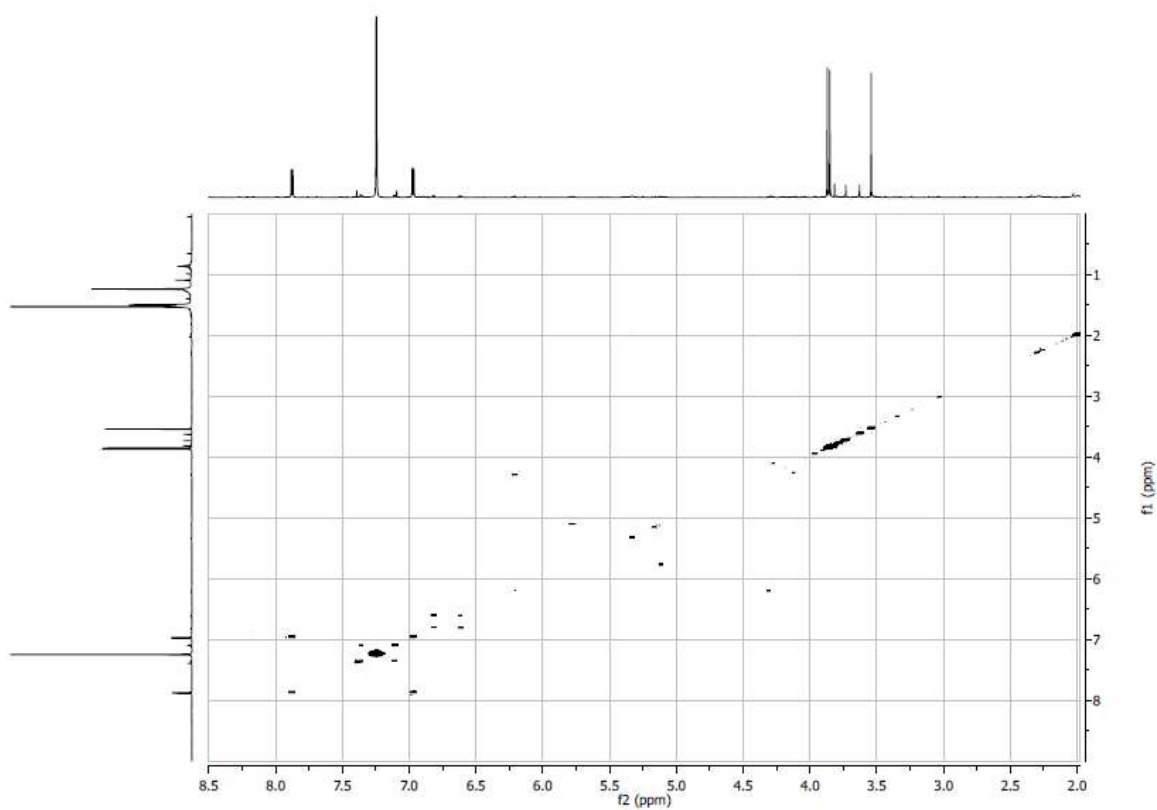

Figure S11. COSY spectrum of polyaurine B (**2**) in CDCl<sub>3</sub> (700 MHz)

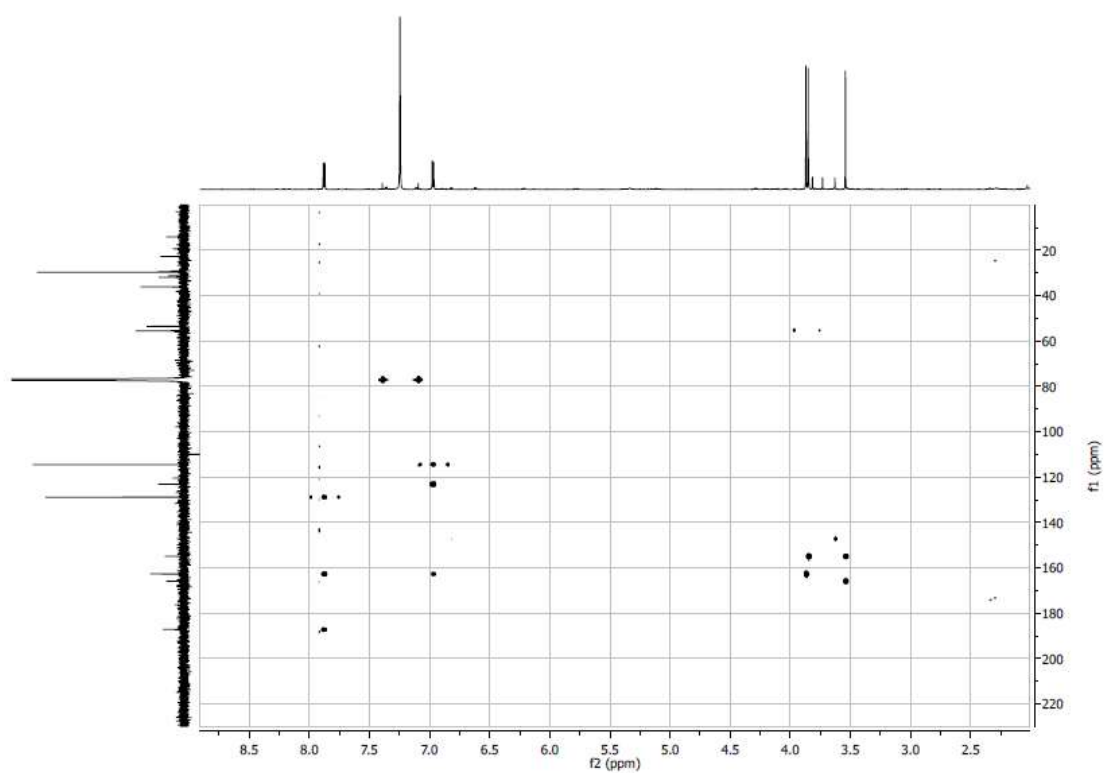

Figure S12. HMBC spectrum of polyaurine B (**2**) in CDCl<sub>3</sub> (700 MHz)



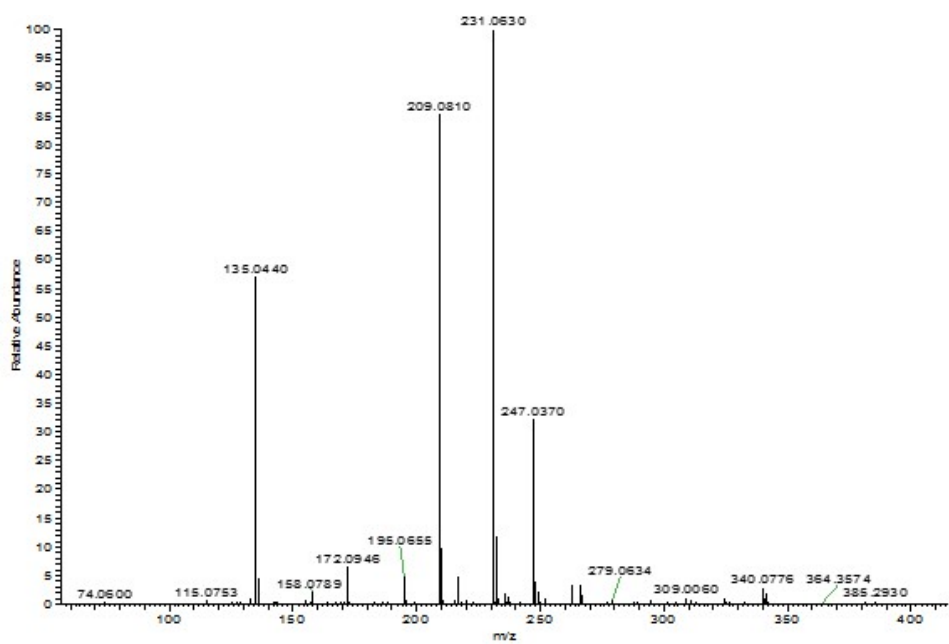

**Figure S13.** HRESI-MS spectrum of compound 3

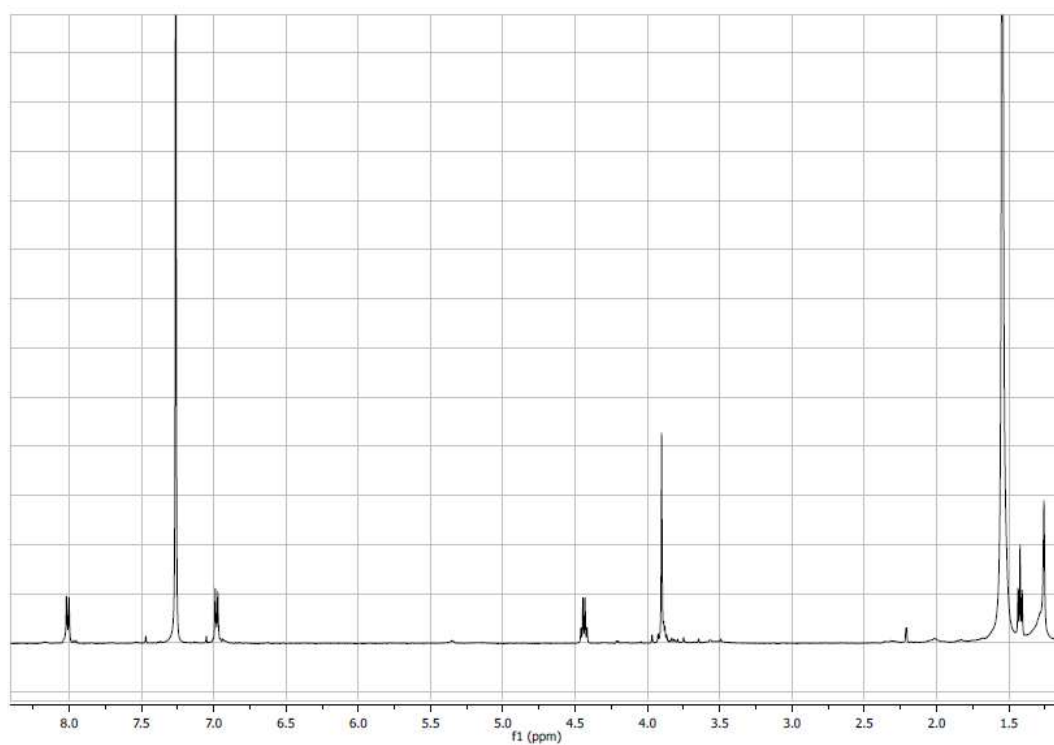

**Figure S14.** <sup>1</sup>H NMR spectrum of compound 3 in CDCl<sub>3</sub> (700 MHz)

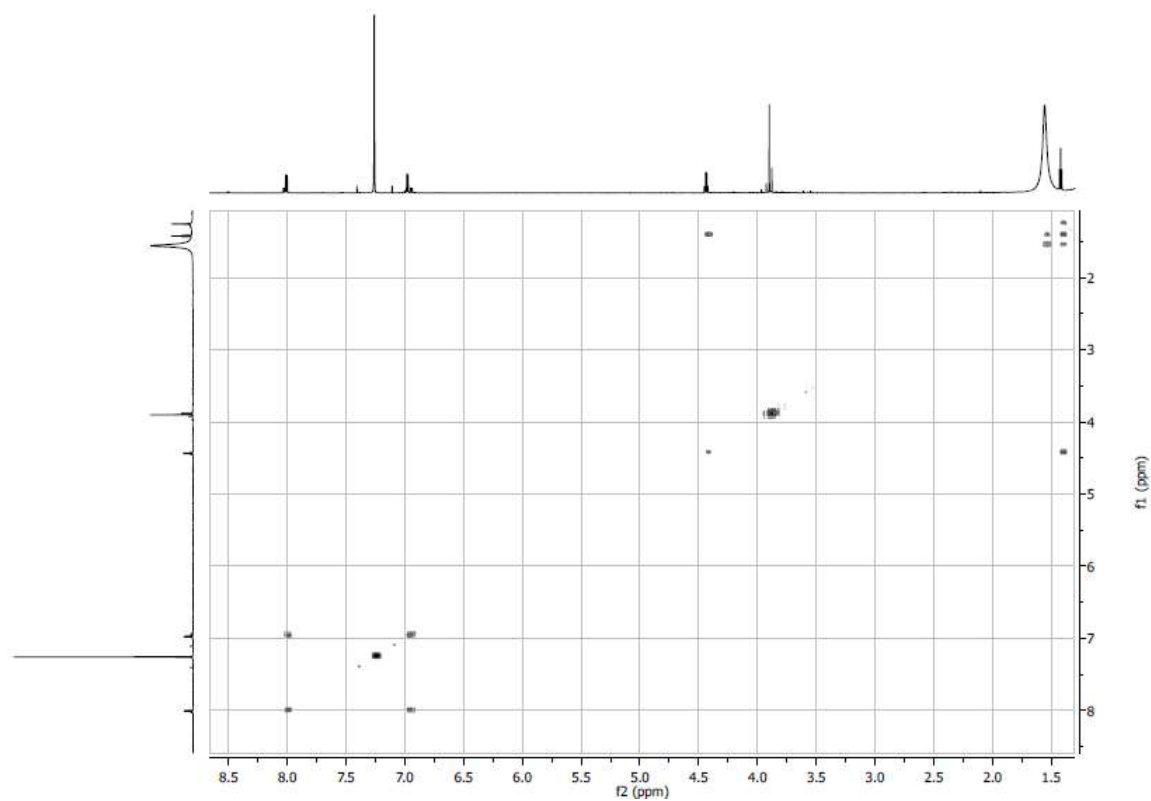

**Figure S15.** COSY spectrum of compound **3** in  $\text{CDCl}_3$  (700 MHz)

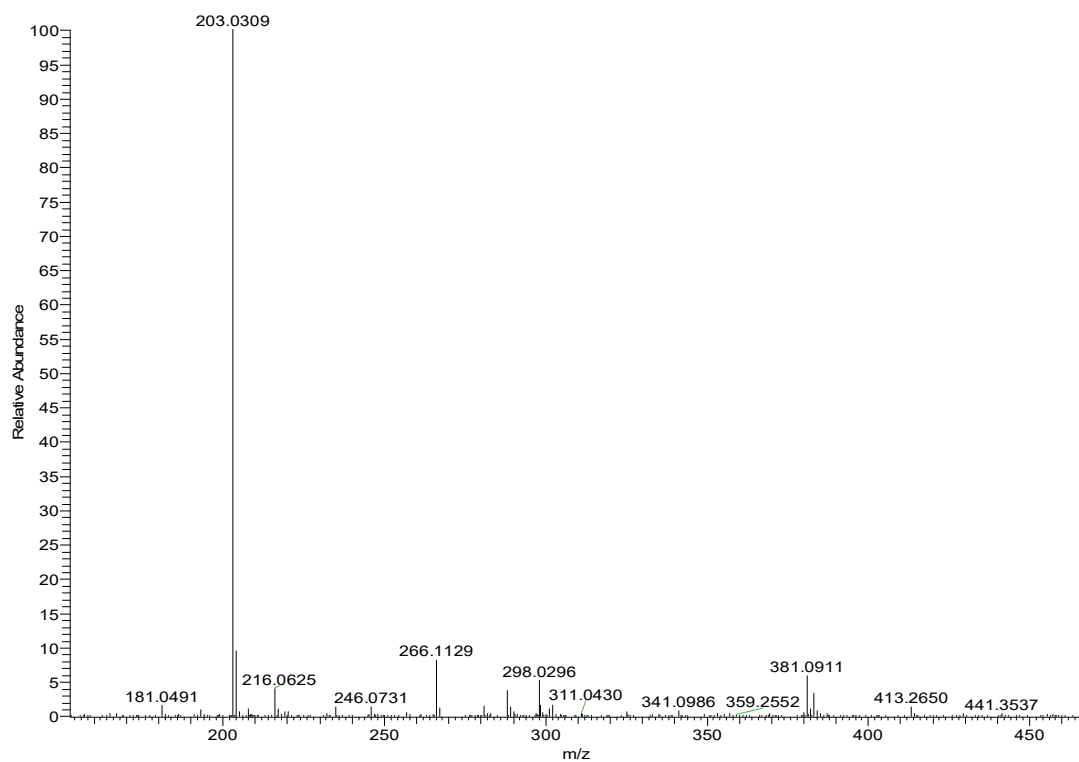

**Figure S16.** HRESI-MS spectrum of compound **4**

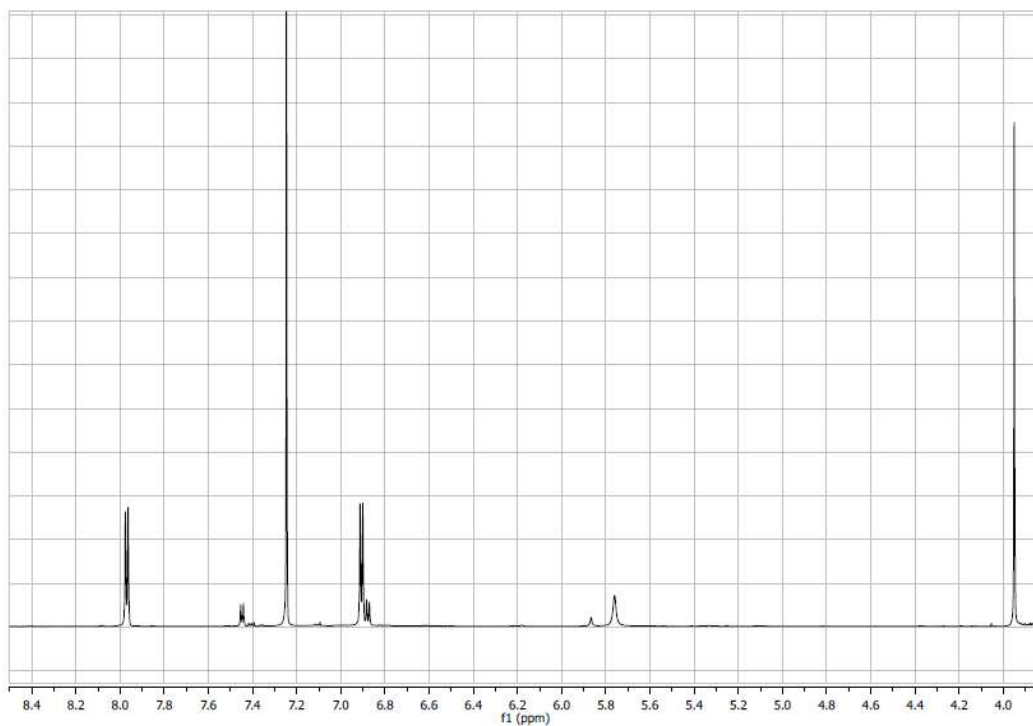

Figure S17.  $^1\text{H}$  NMR spectrum of compound **4** in  $\text{CDCl}_3$  (700 MHz)

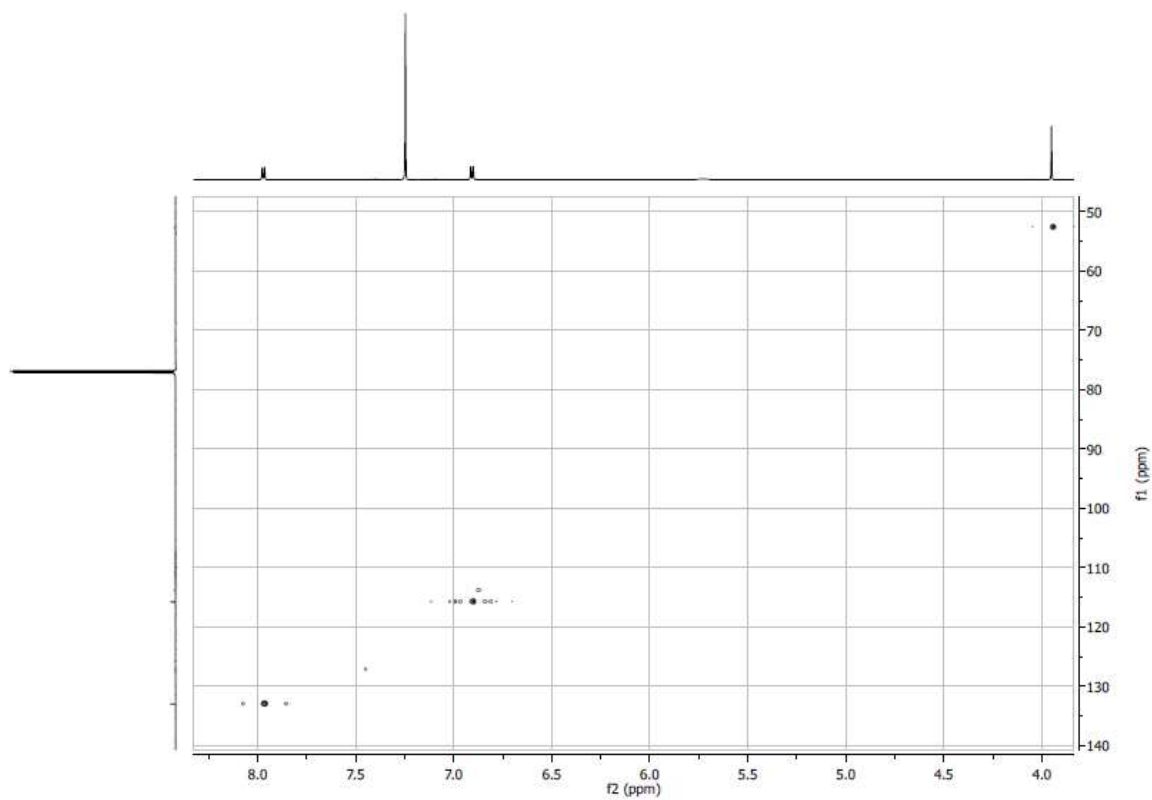

Figure S18. HSQC spectrum of compound **4** in  $\text{CDCl}_3$  (700 MHz)

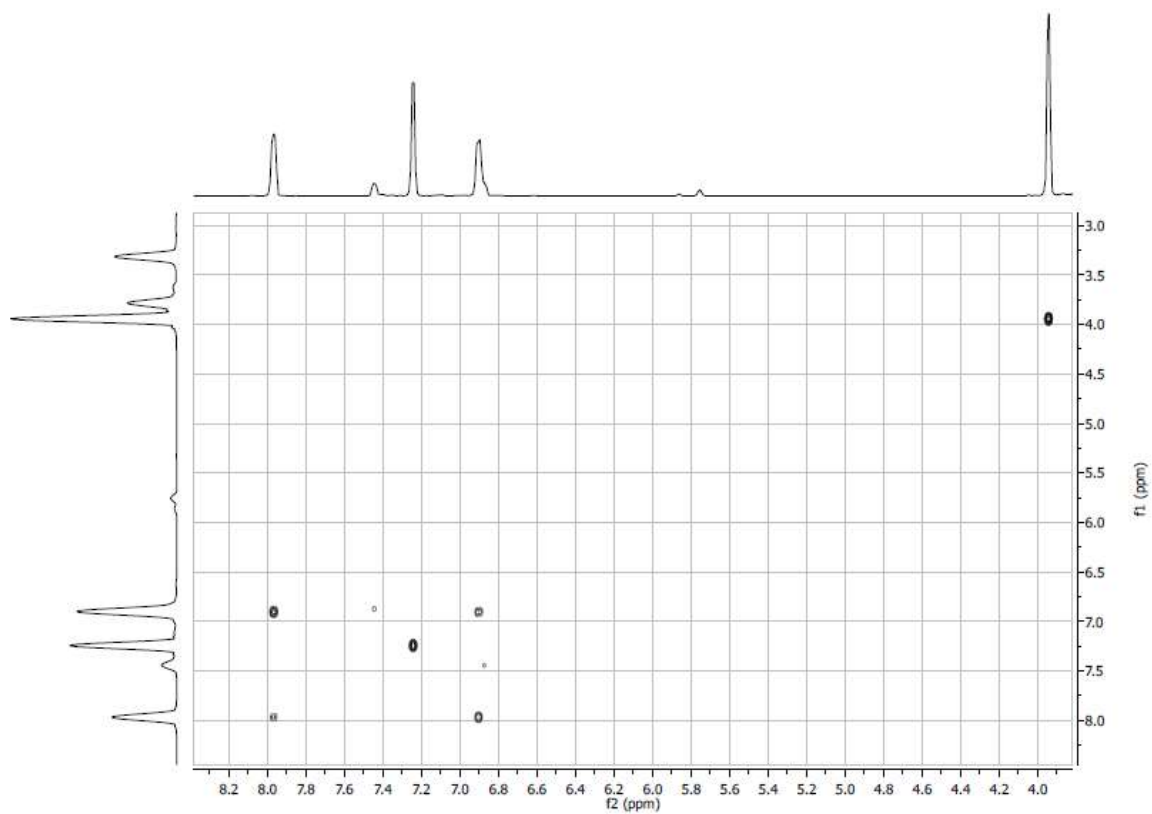

**Figure S19.** COSY spectrum of compound **4** in CDCl<sub>3</sub> (700 MHz)

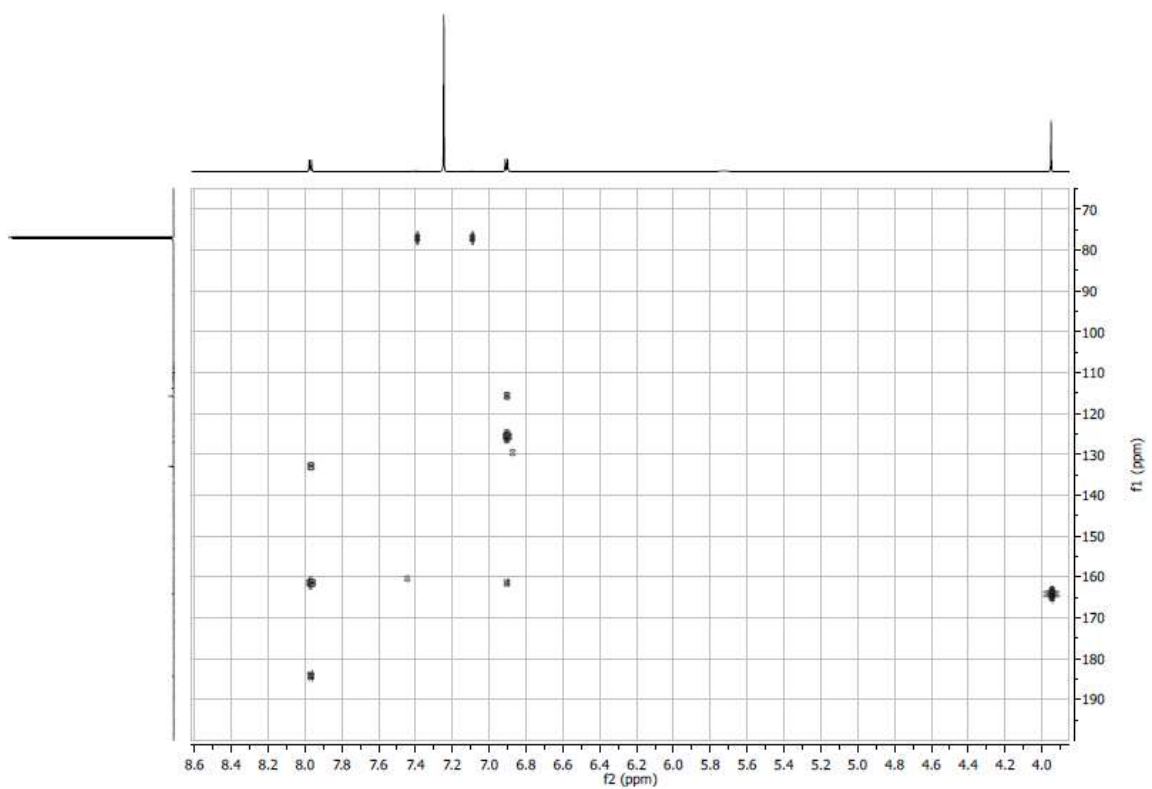

**Figure S20.** HMBC spectrum of compound **4** in CDCl<sub>3</sub> (700 MHz)

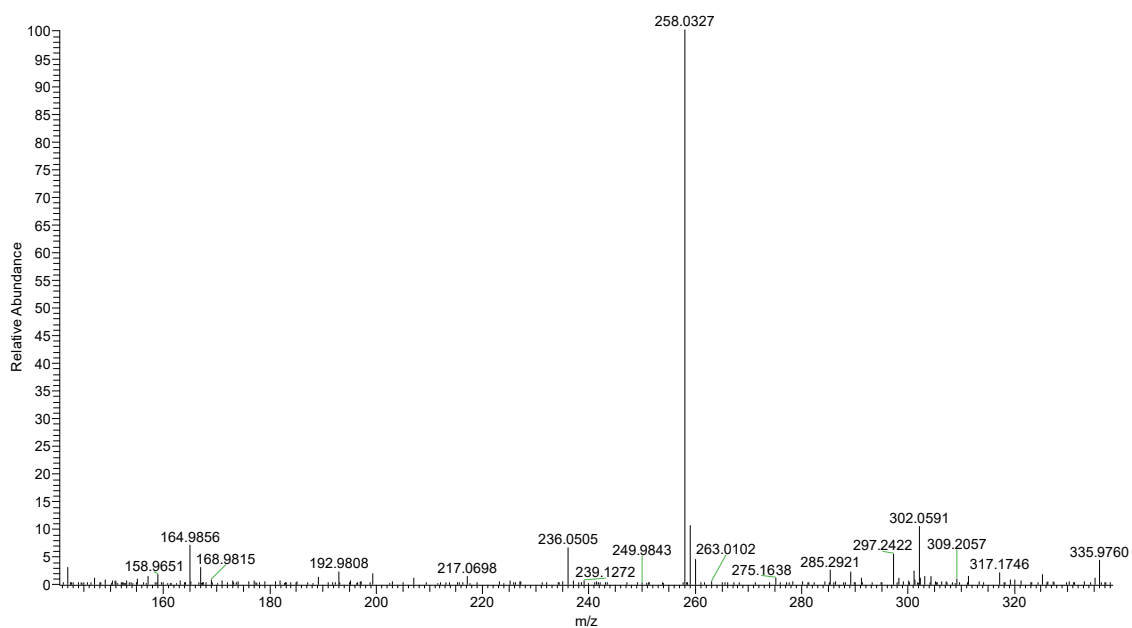

Figure S21. HRESI-MS spectrum of compound 5

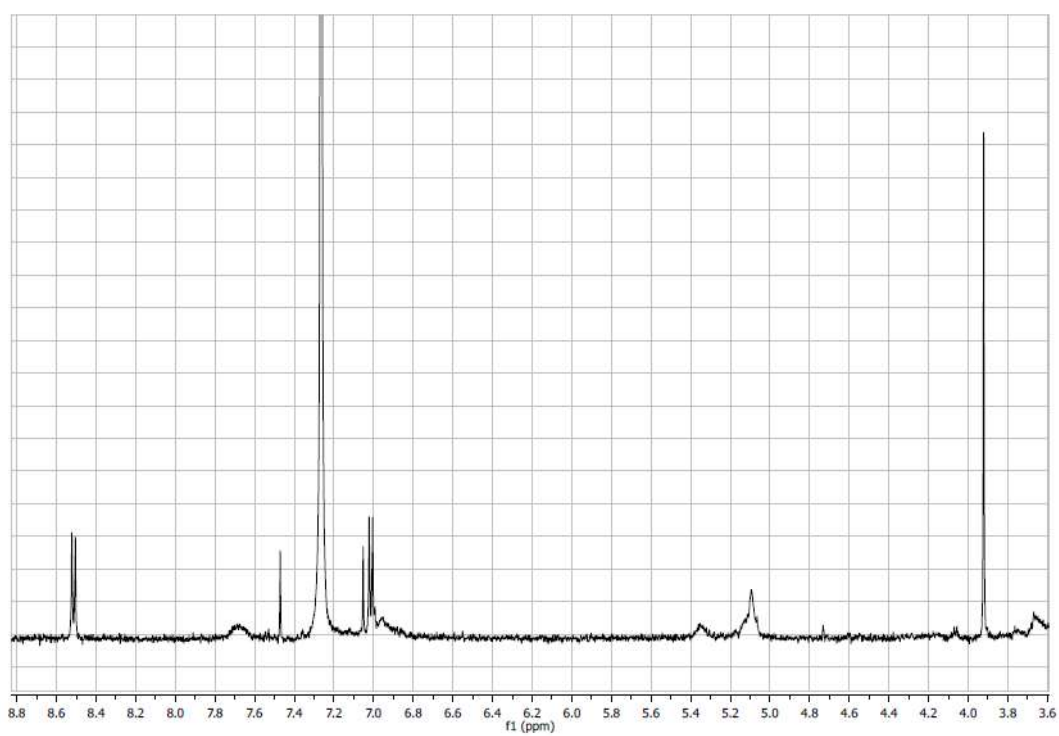

Figure S22. <sup>1</sup>H NMR spectrum of compound 5 in CDCl<sub>3</sub> (700 MHz)

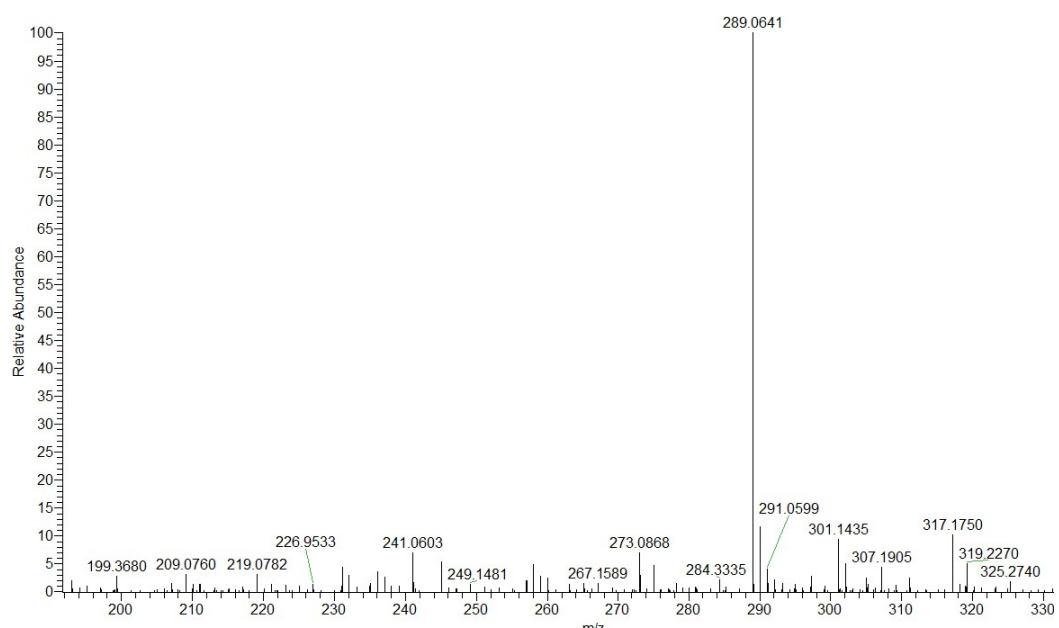

**Figure S23.** HRESI-MS spectrum of compound **6**

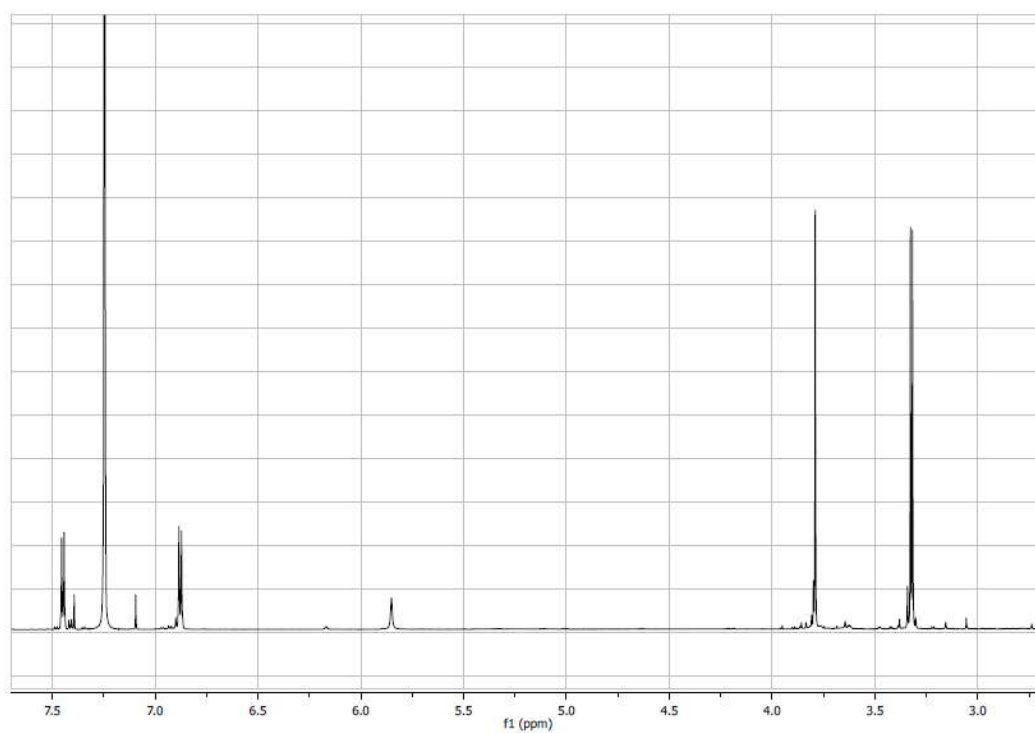

**Figure S24.** <sup>1</sup>H NMR spectrum of compound **6** in CDCl<sub>3</sub> (500 MHz)

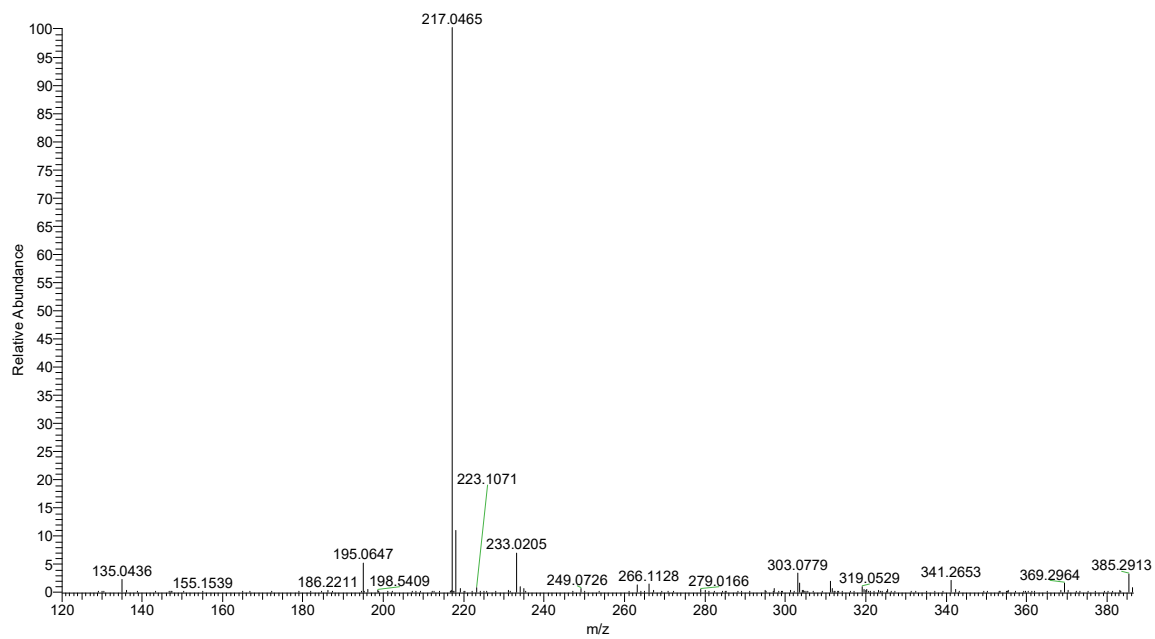

**Figure S25.** HRESI-MS spectrum of compound 7

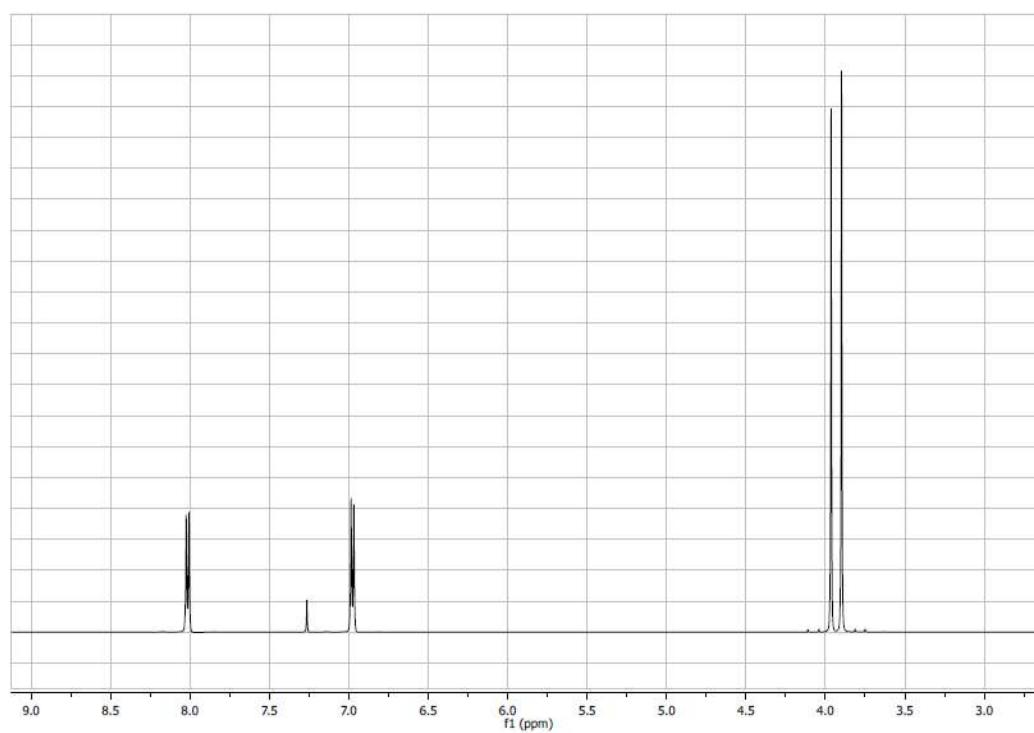

**Figure S26.** <sup>1</sup>H NMR spectrum of compound 7 in CDCl<sub>3</sub> (500 MHz)

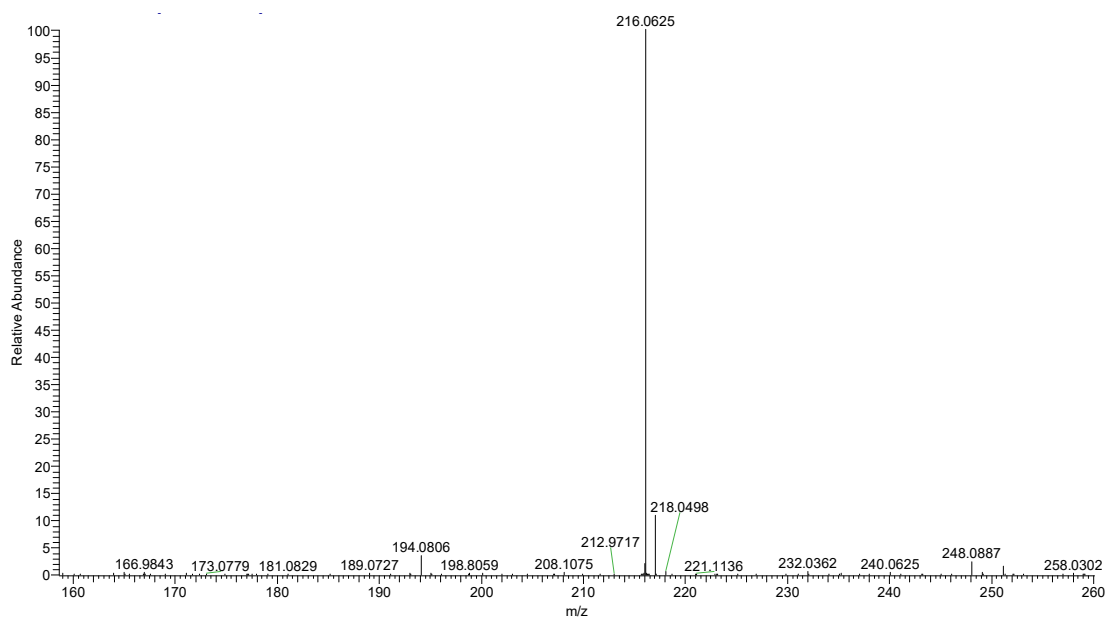

**Figure S27.** HRESI-MS spectrum of compound **8**

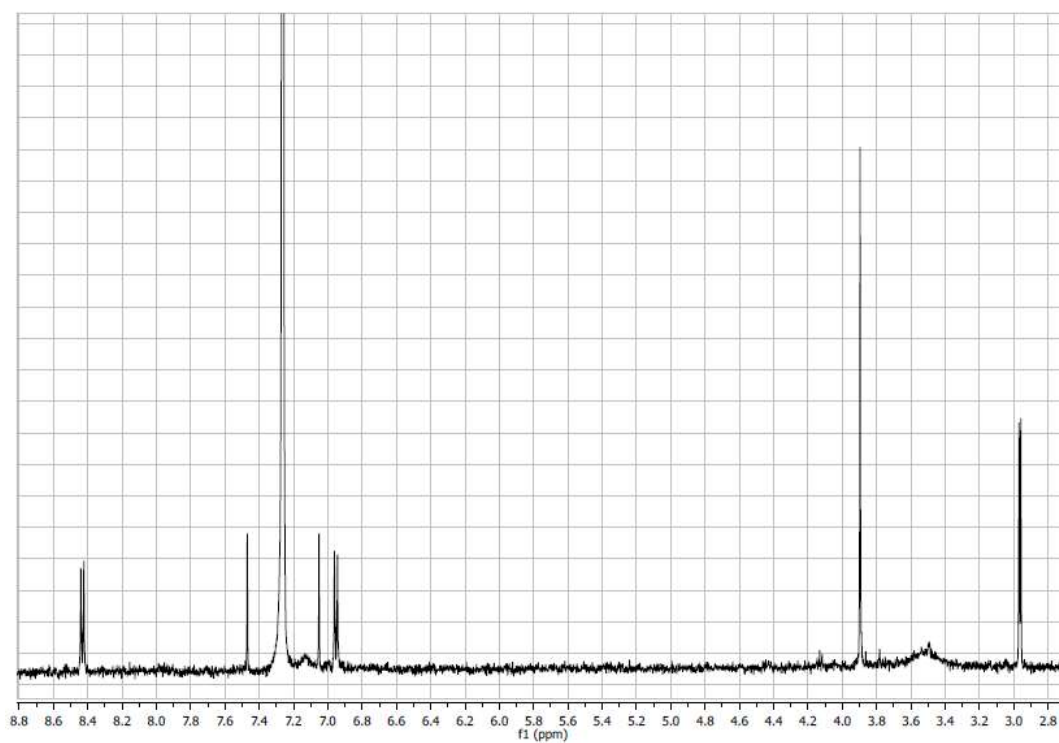

**Figure S28.** <sup>1</sup>H NMR spectrum of compound **8** in CDCl<sub>3</sub> (700 MHz)
